# Supplementary material
Source: MDPI journal article supplement (https://www.mdpi.com/2297-8739/9/11/352)
Supplement: s1 [file s1]

Phytochemical Compounds Profile And Estimation Of Ferruginol Compound In Different parts (root, leaf, and seed) Of *Juniperus procera*

Abdalrhaman M. Salih\*, Fahad Al-Qurai ny, Mohamed Tarroum, Salim Khan, Mohammad Nadeem, Hassan O. Shaikhaldein & Saleh Alansi

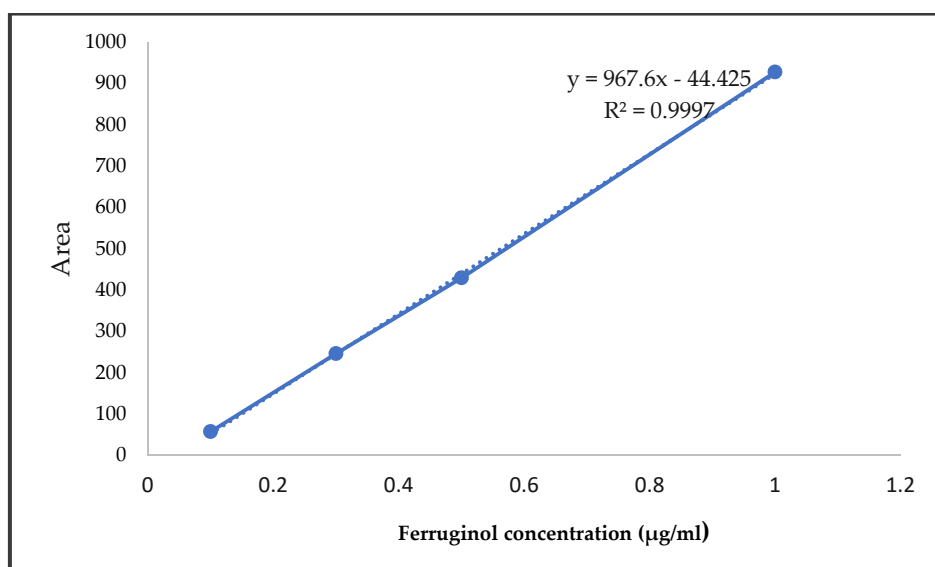

**Figure S1:** Ferruginol standard curve.

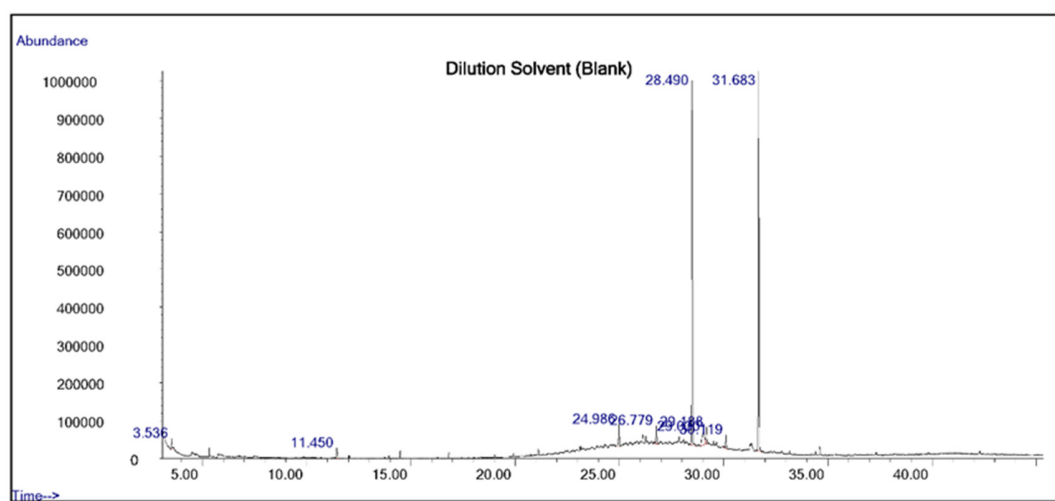

**Figure S2.** GC-MS chromatogram of blank (methanol).
